# Supplementary material for: Cyclopropenyllithiums as a new source of 1,1-bismetalated cyclopropyl derivatives
Source: Royal Society of Chemistry journal article supplement (doi:10.1039/b807635a), 2008-01-01

Supplementary Material (ESI) for Chemical Communications  
This journal is (c) The Royal Society of Chemistry 2008

## Cyclopropenyllithiums as a New Source of 1,1-Bismetallated Cyclopropyl Derivatives

Anat Levin and Ilan Marek\*

### General

All reactions were carried out under argon using standard Schlenk techniques.  $^1\text{H}$  and  $^{13}\text{C}$  NMR spectra were recorded on a Bruker Avance 300 or Avance 500 instruments in  $\text{CDCl}_3$ . Chemical shifts are given as ppm relative to the residual solvent peak (chloroform- $d_1$ : 7.26 ppm/77.0 ppm). Column chromatography purification was performed on Merck silica gel 60 (230-400 mesh ASTM). THF and Diethyl Ether were dried with sodium/benzophenone and distilled. Yields refer to isolated yields of compounds. Methyllithium (1.6M solution in diethyl ether), *t*-Butyllithium (1.7M solution in pentane), zinc bromide and copper (I) cyanide were purchased from Aldrich Chemicals Co Inc and used without further purification.

### General Procedure for the allylmetalation of cyclopropenyllithium coming from tribromocyclopropane:

To a solution of the appropriate tribromocyclopropane (1 mmol) in dry diethyl ether (15 ml) at  $-78^\circ\text{C}$  *t*BuLi was added dropwise (4 mmol, 2.35 ml, 1.7 M). The reaction mixture was warmed to  $-10^\circ\text{C}$  for 1 h. Then, the reaction mixture was cooled to  $-30^\circ\text{C}$  and allylmagnesium bromide (2 mmol, 1.3 M in diethyl ether) was added followed by a zinc bromide solution (2 mmol, 1 M in diethyl ether). The reaction solution was warmed to  $-10^\circ\text{C}$  for 30 min. The reaction was quenched with 1M HCl. The aqueous layer was washed with diethyl ether (3 x 15 ml), the organic layers were combined and washed with saturated  $\text{NaHCO}_3$  (1 x 20 ml), brine (20 ml) and dried over  $\text{MgSO}_4$ .

**1-allyl-1-butyl-cyclopropane 5:** The reaction was performed with 1,1,2-tribromo-2-butylcyclopropane following the general allylmetalation procedure. Purification on silica gel (hexane as eluent) gave **5** in 81% yield as colorless oil.  $^1\text{H}$  NMR ( $\text{CDCl}_3$ , 300 MHz): 5.84-5.73 (m, 1H), 5.03-4.95 (m, 2H), 1.98-1.96 (d,  $J = 6$ , 2H), 1.31-1.19 (m, 6H), 0.85 (t,  $J = 9$ , 3H), 0.27-0.91 (m, 4H)  $^{13}\text{C}$  NMR ( $\text{CDCl}_3$ , 75 MHz): 136.8, 115.7, 40.35, 35.97, 29.75, 28.75, 22.96, 19.07, 14.07, 11.20.

**1-allyl-cyclopropyl-benzene 6:** The reaction was performed with 1,1,2-tribromo-2-phenylcyclopropane following the general allylmatalation procedure. Purification on silica gel (hexane as eluent) gave **6** in 75% yield as colorless oil.  $^1\text{H}$  NMR ( $\text{CDCl}_3$ , 300 MHz): 7.29-7.29 (m, 4H), 7.20-7.18 (m, 1H), 5.80-5.74 (m, 1H), 4.97-4.93 (m, 2H), 2.37 (d,  $J = 3.6$ , 2H), 0.92-0.83 (m, 2H), 0.77-0.71 (m, 2H).  $^{13}\text{C}$  NMR ( $\text{CDCl}_3$ , 75 MHz): 12.8, 14.2, 28.4, 43.9, 60.4, 116.2, 125.9, 128.0, 128.6, 136.1.

**1-butyl-1-(1-methyl-allyl)-cyclopropane 7:** To a mixture of 1,1,2-tribromo-2-butylcyclopropane (1 mmol) in diethyl ether (15 ml) at  $-78\text{ }^\circ\text{C}$ ,  $t\text{-BuLi}$  (4 mmol, 1.7 M) was added dropwise. The solution was heated to  $-10\text{ }^\circ\text{C}$  for 1 h. The mixture was cooled to  $-30\text{ }^\circ\text{C}$  and crotylmagnesium bromide (2.5 mmol, 1.3 M) was added followed by a zinc bromide solution (2.5 mmol, 1 M in diethyl ether). The mixture was warmed to  $-10\text{ }^\circ\text{C}$  for 1 h. The reaction was quenched by 1M HCl. The aqueous layer was washed with diethyl ether (3 x 15 ml), saturated  $\text{NaHCO}_3$  (1 x 20 ml), brine (20 ml) and dried over  $\text{MgSO}_4$ . The organic layers were combined and evaporated. Purification on silica gel (hexane as eluent) gave **7** in 65% yield as colorless oil.  $^1\text{H}$  NMR ( $\text{CDCl}_3$ , 300 MHz): 5.81-5.74 (m, 1H), 4.98-4.94 (m, 2H), 1.92-1.89 (m, 1H), 1.30-1.22 (m, 6H), 0.99 (s, 3H), 0.89-0.86 (t, 3H), 0.31-0.23 (m, 4H).  $^{13}\text{C}$  NMR ( $\text{CDCl}_3$ , 75 MHz): 9.3, 9.8, 14.2, 16.2, 22.7, 29.3, 30.3, 42.3, 113.4, 142.5.

**1-allyl-1-butyl-2,2-diiodo-cyclopropane 8:** The reaction was performed with 1,1,2-tribromo-2-butylcyclopropane following the general allylmatalation procedure. Once the formation of the bismetalated cyclopropyl derivative was completed, a solution of iodine (4 mmol) in THF (4 ml) was added at  $-10\text{ }^\circ\text{C}$  and the mixture was warmed to r.t. for 30 min. Purification on silica gel (hexane as eluent) gave **8** in 68% yield as colorless oil.  $^1\text{H}$  NMR ( $\text{CDCl}_3$ , 300 MHz): 5.90-5.78 (m, 1H), 5.18-5.10 (m, 2H), 2.45-2.40 (dd,  $J = 7.2$ ,  $J = 7.2$ , 1H), 2.26-2.19 (dd,  $J = 7.2$ ,  $J = 7.2$ , 1H), 1.61-1.56 (m, 2H), 1.54-1.50 (m, 2H), 1.34-1.1.30 (m, 4H), 0.92-0.87 (t,  $J = 7.2$ , 3H).  $^{13}\text{C}$  NMR ( $\text{CDCl}_3$ , 75 MHz) -43.3, 14.1, 22.7, 27.7, 29.2, 32.1, 36.5, 37.9, 42.5, 117.5, 134.4.

**(2-allyl-2-butyl-cyclopropylidenemethyl)-benzene 9:** The reaction was performed with 1,1,2-tribromo-2-butylcyclopropane following the general allylmatalation

procedure. Once the formation of the bismetalated cyclopropyl derivative was completed,  $\text{BF}_3 \cdot \text{OEt}_2$  (1.5 mmol) was added followed by benzyldenemalonate (1.5 mmol) at  $-15^\circ\text{C}$  and the reaction mixture was gradually warmed to room temperature over night. Purification on silica gel (hexane as eluent) gave **9** with a E:Z ratio of 15:85 in 60% yield as colorless oil.  $^1\text{H}$  NMR ( $\text{CDCl}_3$ , 300 MHz): 7.30-7.27 (m, 4H), 7.16-7.10 (m, 1H), 6.61-6.60 (t,  $J = 1.8$ , 1H), 5.66-5.53 (m, 1H), 4.99-4.88 (m, 2H), 2.46-2.32 (m, 1H), 2.31-2.29 (m, 1H), 1.26-1.2 (m, 6H), 0.99-0.98 (d,  $J = 3$ , 2H), 0.85-0.8 (t, 3H)  $^{13}\text{C}$  NMR ( $\text{CDCl}_3$ , 75 MHz): 11.20, 15.91, 21.03, 22.89, 27.77, 28.55, 34.63, 39.69, 115.4, 116.4, 126.0, 126.3, 128.8, 129.0, 135.1, 135.6.

**1-(2-allyl-2-butyl-cyclopropylidenemethyl)-4-methyl-benzene 10:** The reaction was performed with 1,1,2-tribromo-2-butylcyclopropane following the general allylmatalation procedure. Once the formation of the bismetalated cyclopropyl derivative was completed, tolualdehyde (4 mmol) was added at  $-15^\circ\text{C}$  and the reaction mixture was gradually warmed to room temperature over night. Purification on silica gel (hexane as eluent) gave **10** with a E:Z ratio of 1:2 in 53% yield as colorless oil.  $^1\text{H}$  NMR ( $\text{CDCl}_3$ , 300 MHz): 7.42 (d,  $J = 8.1$ , 1H), 7.25-7.22 (d,  $J = 6.3$ , 2H), 7.19-7.10 (m, 0.5H), 6.71 (t, 1H), 6.66 (t, 1H), 5.92-5.60 (m, 1.5H), 5.08-4.93 (m, 3.5H), 2.50-2.43 (dd,  $J = 8.1$ ,  $J = 7.8$ , 1H), 2.32 (s, 6H), 2.22-2.17 (m, 1H), 1.50-1.20 (m, 12H), 1.02 (d,  $J = 1.8$ , 2H), 0.90-0.87 (t, 6H)  $^{13}\text{C}$  NMR ( $\text{CDCl}_3$ , 75 MHz): 11.20, 15.91, 21.03, 22.89, 27.77, 28.55, 34.63, 39.69, 115.4, 116.4, 126.0, 126.3, 128.8, 129.0, 135.1, 135.6.

**1,1,2-triallyl-2-butylcyclopropane 11:** The reaction was performed with 1,1,2-tribromo-2-butylcyclopropane following the general allylmatalation procedure. Once the formation of the bismetalated cyclopropyl derivative was completed, the mixture was cooled to  $-78^\circ\text{C}$  and copper cyanide was added (4 mmol), the mixture was then warmed to  $-20^\circ\text{C}$  for 30 min. Once the transmetalation was complete allyl bromide was added (4 mmol) and the mixture was stirred for additional 12 h at room temperature. The reaction was quenched by  $\text{NH}_4\text{OH}:\text{NH}_4\text{Cl}$  1:2. Purification on silica gel (hexane as eluent) gave **11** in 60% yield as colorless oil.  $^1\text{H}$  NMR ( $\text{CDCl}_3$ , 300 MHz): 5.78-5.70 (m, 3H), 5.05-4.98 (m, 6H), 2.33-2.10 (m, 6H), 1.34-1.24 (m, 6H), 0.89-0.85 (t,  $J = 6$ , 3H), 0.25-0.21 (q,  $J = 6$ ,  $J = 9$ , 2H)  $^{13}\text{C}$  NMR ( $\text{CDCl}_3$ , 75 MHz): 137.3, 137.2, 137.1, 115.9, 115.6, 36.7, 36.5, 36.3, 31.8, 28.9, 28.2, 27.5, 23.3, 23.1

**2-allyl-2-butyl-cyclopropanecarboxylic acid 15:** to a solution of 1-butylcyclopropanecarboxylic acid (1 mmol) in diethyl ether (15 ml), MeLi (2.2 mmol, 1.6 M) was added dropwise at -78 °C. The solution was warmed to room temperature for 1 h. The mixture was cooled again to -50 °C and allylmagnesium bromide (2.2 mmol, 1.3 M) was added followed by a solution of zinc bromide (2.2 mmol, 1 M in diethyl ether). The reaction mixture was warmed to room temperature for 30 min. The reaction was quenched by 1M HCl. The aqueous layer was washed with diethyl ether (3 x 15 ml), the organic layers were combined and washed with saturated NaHCO<sub>3</sub> (1 x 20 ml), brine (20 ml) and dried over MgSO<sub>4</sub>. Purification on silica gel (hexane:ethyl acetate 1:2 as eluent) gave **15** as a unique diastereoisomer in 50% yield. <sup>1</sup>H NMR (CDCl<sub>3</sub>, 200 MHz): 5 0.87 (t, J = 5.3, 3H), 0.96 (dd, J = 7.9, 4.5, 1H), 1.13 – 1.37 (m, 11H), 1.52 (dd, J = 7.9, 5.5, 1H), 2.08-2.37 (m, 2H), 5.00 – 5.09 (m, 2H), 5.64 – 5.84 (m, 1H), 1.50-12.0 (bs, 1H); <sup>13</sup>C NMR (CDCl<sub>3</sub>, 50 MHz): 14.0, 21.3, 22.6, 25.5, 26.0, 29.3 (overlapped two peaks), 31.8, 33.5, 37.0, 16.5, 135.7, 179.4.

**General Procedure for allylmetalation of 1-hexyl-3-hydroxymethylcyclopropene:** MeLi (2.2 mmol, 1.6M) was added dropwise to a mixture of the alcohol (1 mmol) in diethyl ether (15 ml) at -78 °C. The solution was warmed to room temperature for 1 h. Then the reaction mixture was cooled again to -50 °C and allylmagnesium bromide (2.2 mmol, 1.7 ml, 1.3 M) was added followed by a solution of zinc bromide (2.2 mmol, 22 ml, 1 M in diethyl ether). The reaction mixture was stirred for 4 h at -50 °C. The reaction was quenched by 1M HCl. The aqueous layer was washed with diethyl ether (3 x 15 ml), the organic layers were combined and washed with saturated NaHCO<sub>3</sub> (1 x 20 ml), brine (20 ml) and dried over MgSO<sub>4</sub>.

**(2-allyl-2-butyl-cyclopropyl)-methanol 16:** The general procedure followed. The organic layers were combined and evaporated. Purification on silica gel (hexane:ethyl acetate 1:25 as eluent) gave **16** in 72% yield as a colorless oil, as unique isomer. <sup>1</sup>H NMR (CDCl<sub>3</sub>, 300 MHz): 5.91-5.69 (m, 1H), 5.05-4.97 (m, 2H), 3.72-3.53 (m, 2H), 2.10-2.01 (dd, J = 9, J = 12, 1H), 1.89-1.82 (dd, J = 6, J = 6, 1H), 1.4-1.35 (m, 6H), 0.87 (t, 3H), 0.55-0.51 (q, 1H), 0.16-0.13 (t, 1H) <sup>13</sup>C NMR (CDCl<sub>3</sub>, 75 MHz): 1.00, 14.11, 16.19, 23.02, 25.7, 29.02, 29.68, 30.44, 41.46, 63.40, 116.2, 136.2.

**((1S,2R)-2-allyl-2-butyl-1-phenylcyclopropyl)methanol 17:**

The general procedure followed. The organic layers were combined and evaporated. Purification on silica gel (hexane:ethyl acetate 1:25 as eluent) gave **17** in 60% yield as yellow oil, with d.r. 4:1. <sup>1</sup>H NMR (CDCl<sub>3</sub>, 300 MHz): 7.34-7.13 (m, 7H), 5.71-5.58 (m, 1H), 4.90-4.80 (m, 2H), 3.94-3.90 (d, 1H), 3.6-3.53 (d, 1H), 2.08-1.97 (m, 2H), 1.77-1.69 (m, 2H), 1.47-1.07 (m, 8H), 0.93-0.83 (m, 6H), 0.69-0.67 (m, 3H). <sup>13</sup>C NMR (CDCl<sub>3</sub>, 75 MHz): 141.0, 137.0, 136.5, 130.4, 128.3, 128.2, 126.6, 126.4, 116.1, 115.9, 68.5, 68.4, 39.0, 38.3, 35.9, 33.7, 31.4, 29.7, 29.2, 28.6, 23.0, 22.8, 22.1, 14.1.

**(2-allyl-2-butyl-3,3-diiodo-cyclopropyl)-methanol 18:** The general procedure was followed. When the allylmatalation reaction was over, iodine (5 mmol) in THF (8 ml) was added at -20 °C and the mixture is stirred at this temperature for additional 45 min. Purification on silica gel (hexane:ethyl acetate 1:25 as eluent) gave **18** in 50% yield as a yellow oil. <sup>1</sup>H-NMR (CDCl<sub>3</sub>, 300 MHz): 5.81-5.72 (m, 1H), 5.15-5.07 (m, 2H), 3.63-3.49 (m, 2H), 2.4 (dd, *J* = 12, 1H), 2.2 (dd, *J* = 6, *J* = 12, 1H), 1.5-1.1 (m, 7H), 0.85 (t, 3H).

**(2-allyl-2-butyl-3-iodo-cyclopropyl)-methanol 20:** The general procedure was followed. When the allylmatalation reaction was over, iodine (2.2 mmol) in THF (5 ml) was added at -20 °C and the mixture was stirred at this temperature for additional 30 min. Purification on silica gel (hexane:ethyl acetate 1:25 as eluent) gave **20** in 55% yield as a yellow oil. <sup>1</sup>H NMR (CDCl<sub>3</sub>, 300 MHz): 6.00-5.72 (m, 1H), 5.14-5.04 (m, 2H), 3.72-3.66 (dd, *J* = 6, *J* = 12, 1H), 3.58-3.52 (dd, *J* = 6, *J* = 12, 1H), 2.37 (d, *J* = 6, 1H), 2.31-2.24 (m, 1H), 2.06-1.99 (m, 1H), 1.55-1.47 (m, 2H), 1.36-1.15 (m, 6H), 0.81 (t, 3H).

**(1R,2S)-1-allyl-1-butyl-2-((2-methoxypropan-2-yloxy)methyl)cyclopropane 21:** *n*-BuLi (1.2 mmol, 1.6M) was added dropwise to a mixture of (1 mmol) in diethyl ether (15 ml) at -78 °C. The solution was warmed to -60 °C for 20 min. Then the mixture was warmed to -50 °C, and allylmagnesium bromide (1.2 mmol, 0.93 ml, 1.3 M) was added followed by a solution of zinc bromide (1.2 mmol, 1 M in diethyl ether). The reaction mixture was warmed to -30 °C for 3.5 hours. The reaction was quenched by 1 M NaHCO<sub>3</sub>. The aqueous layer was washed with diethyl ether (3 x 15 ml), the

organic layers were combined and washed with saturated  $\text{NaHCO}_3$  (1 x 20 ml), brine (20 ml) and dried over  $\text{K}_2\text{CO}_3$ . Purification on alumina (pentane:ether 100:1 as eluent) gave **21** in 90% yield as a yellow oil.  $^1\text{H}$  NMR ( $\text{CDCl}_3$ , 300 MHz): 5.78-5.64 (m, 1H), 5.01-4.90 (m, 2H), 3.42-3.40 (dd,  $J=6$   $J=9$ , 1H), 3.26-3.23 (dd,  $J=6$   $J=9$ , 1H), 0.07-0.04 (t,  $J=6$ , 1H).  $^{13}\text{C}$  NMR ( $\text{CDCl}_3$ , 75 MHz): 141.0, 137.0, 136.5, 130.4, 128.3, 128.2, 126.6, 126.4, 116.1, 115.9, 68.5, 68.4, 39.0, 38.3, 35.9, 33.7, 31.4, 29.7, 29.2, 28.6, 23.0, 22.8, 22.1, 14.1.

## NMRs

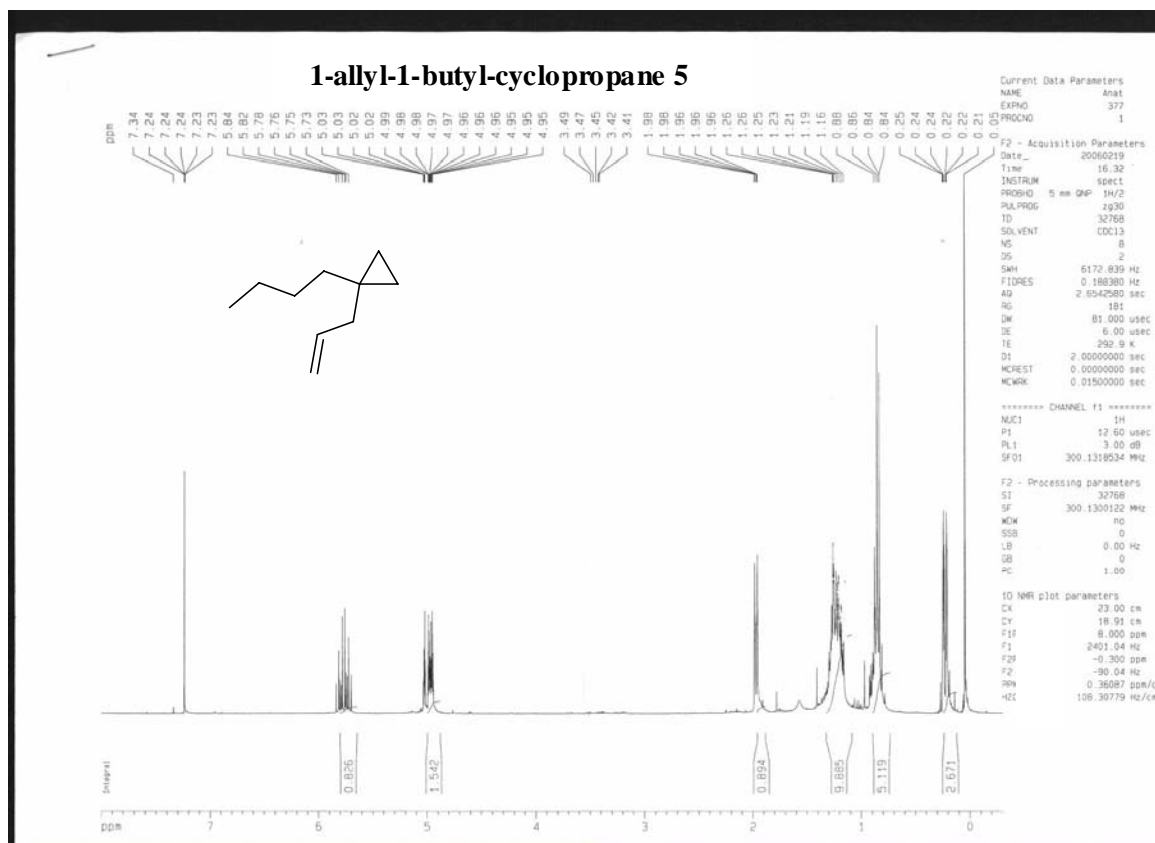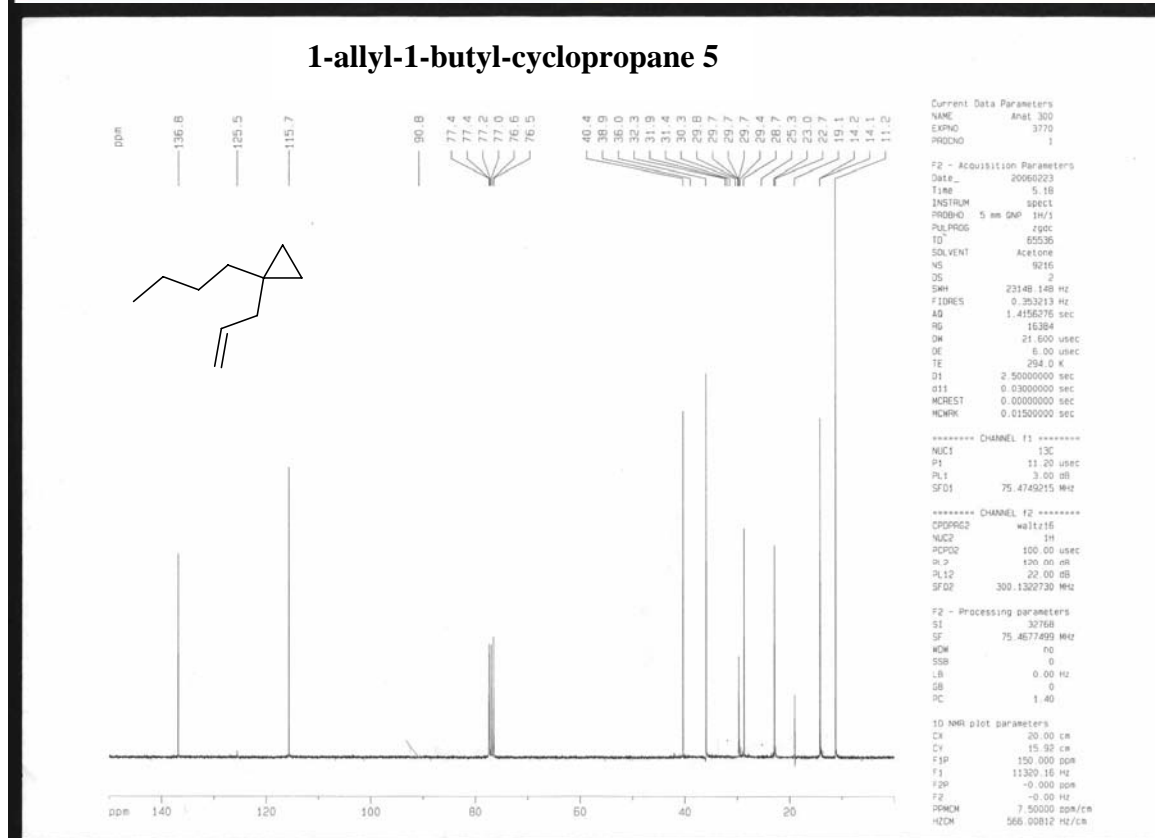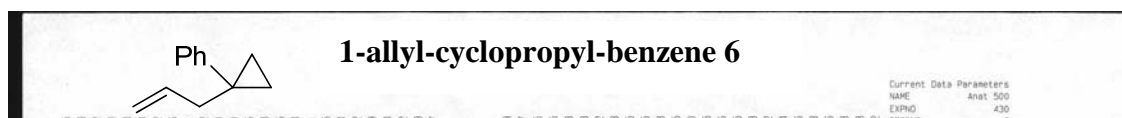

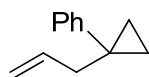

**1-allyl-cyclopropyl-benzene 6**

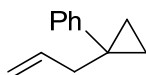



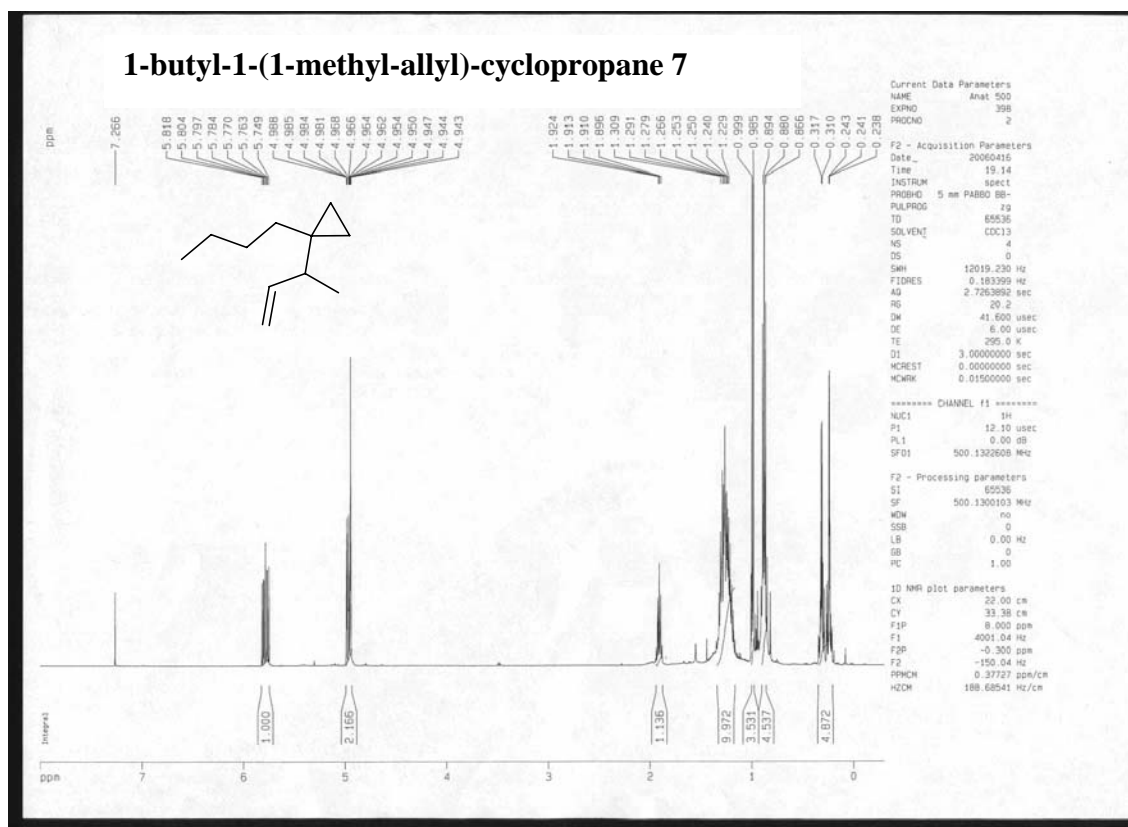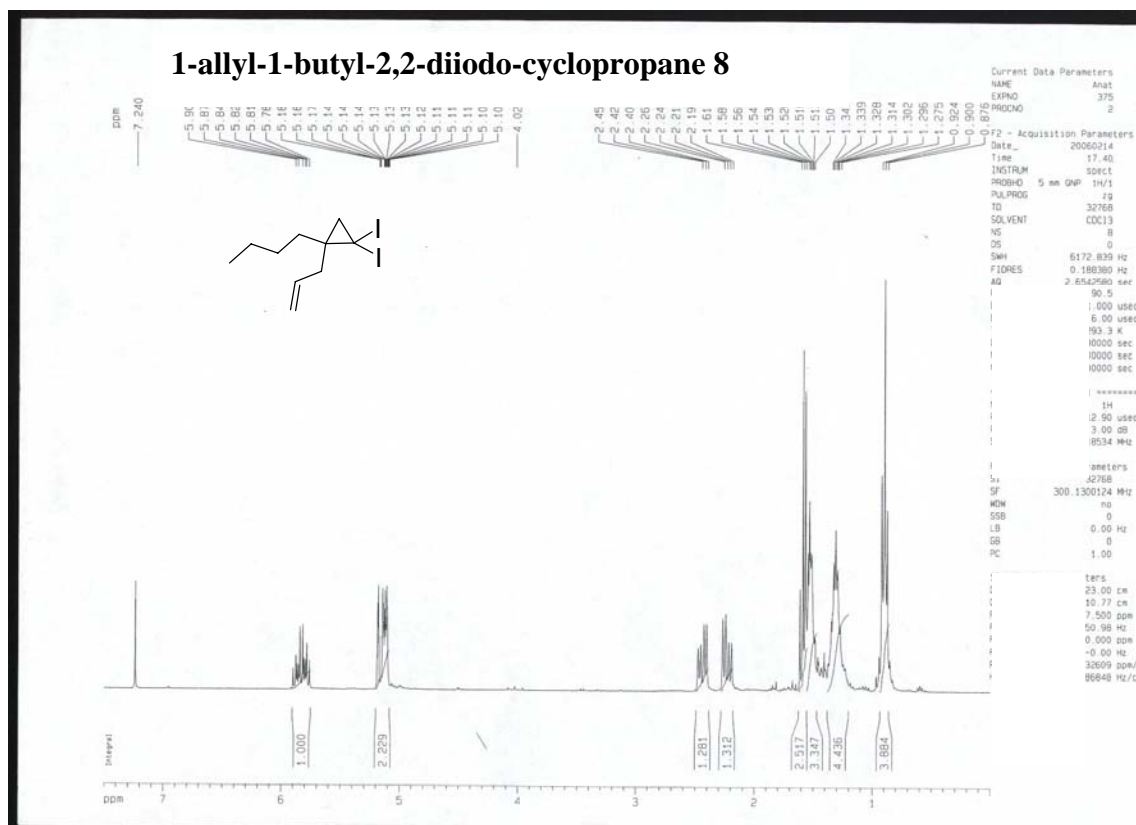

## 1-allyl-1-butyl-2,2-diiodo-cyclopropane 8

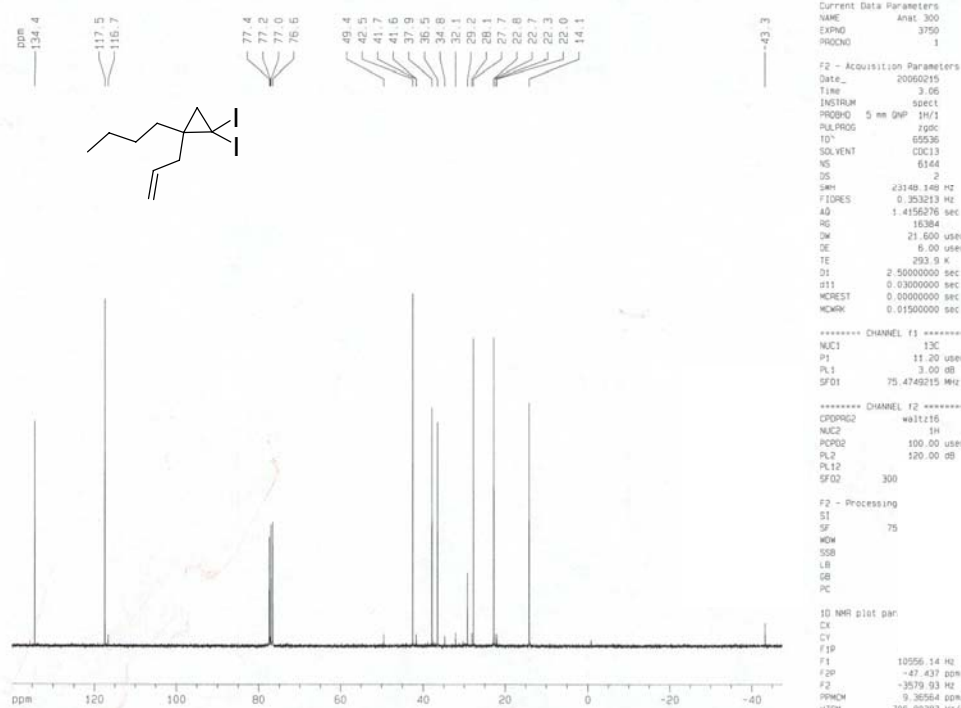

## (2-allyl-2-butyl-cyclopropylidenemethyl)-benzene 9

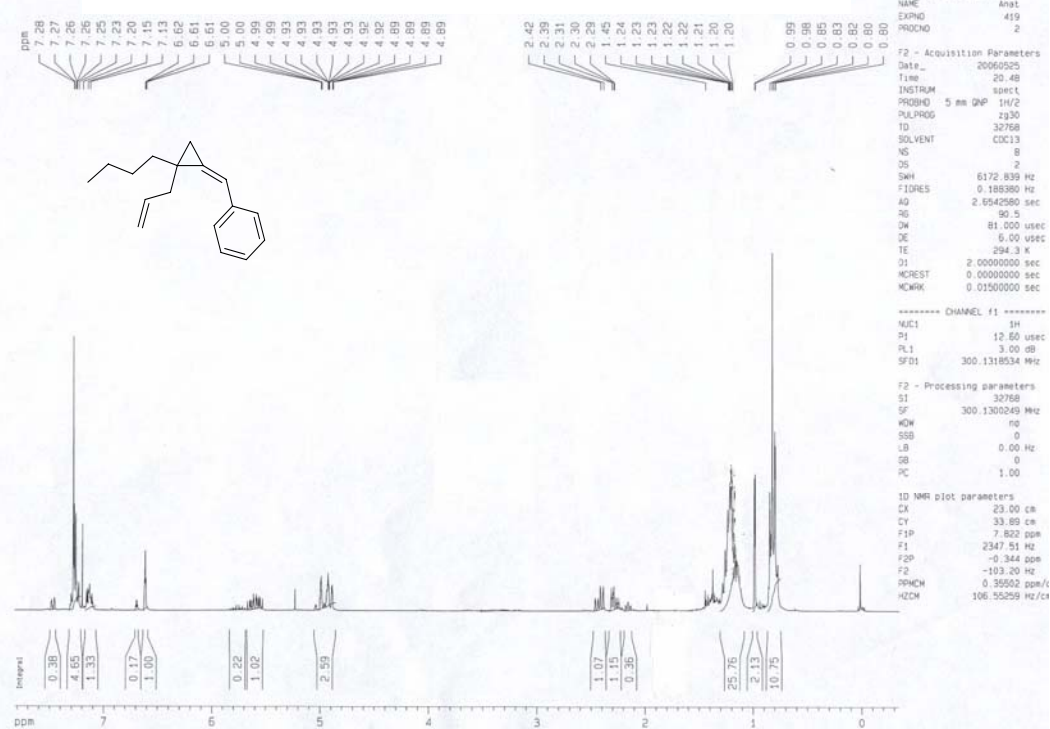

# (2-allyl-2-butyl-cyclopropylidenemethyl)-benzene 9

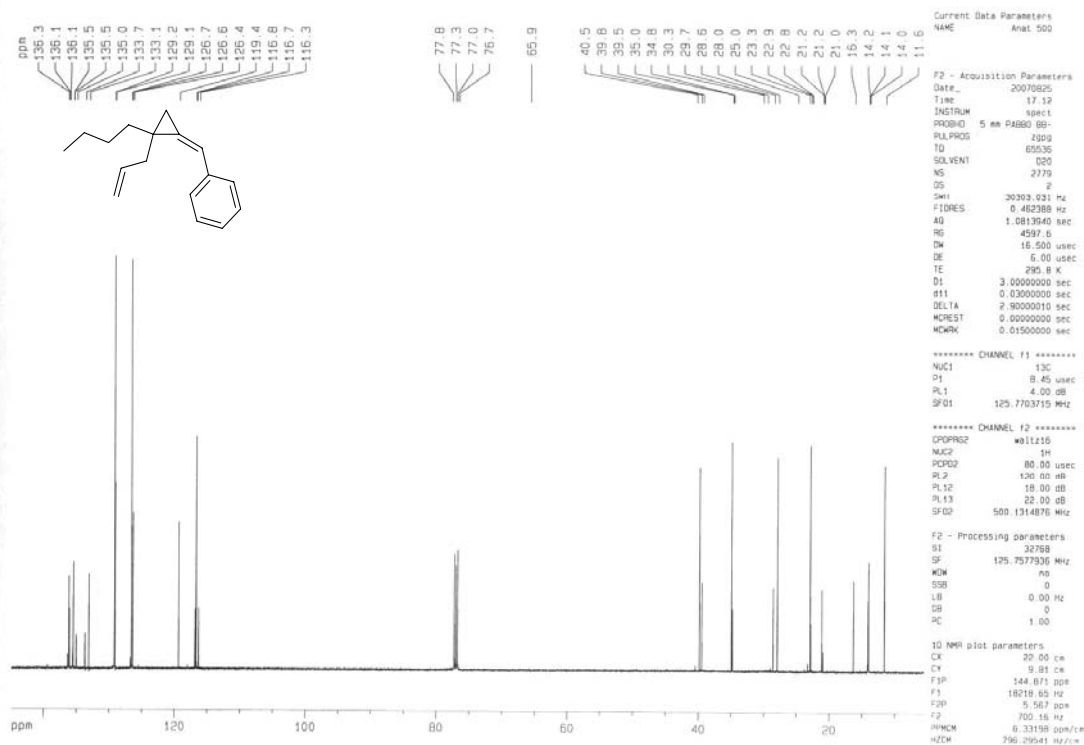

# 1-(2-allyl-2-butyl-cyclopropylidenemethyl)-4-methyl-benzene 10

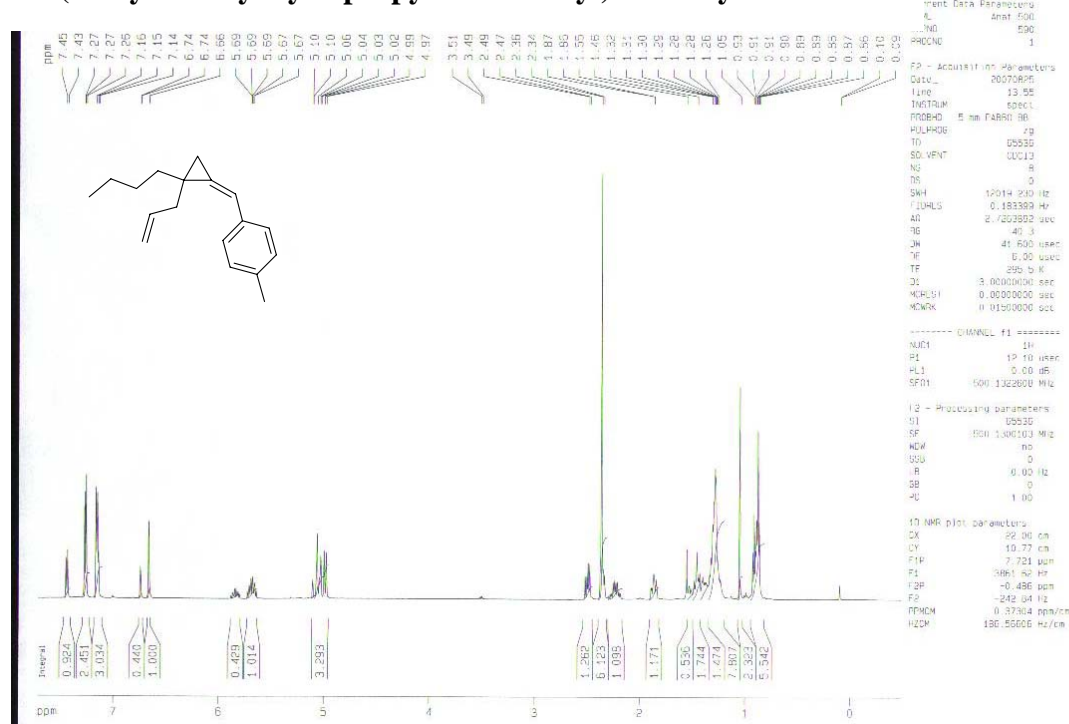

# 1-(2-allyl-2-butyl-cyclopropylidenemethyl)-4-methyl-benzene 10

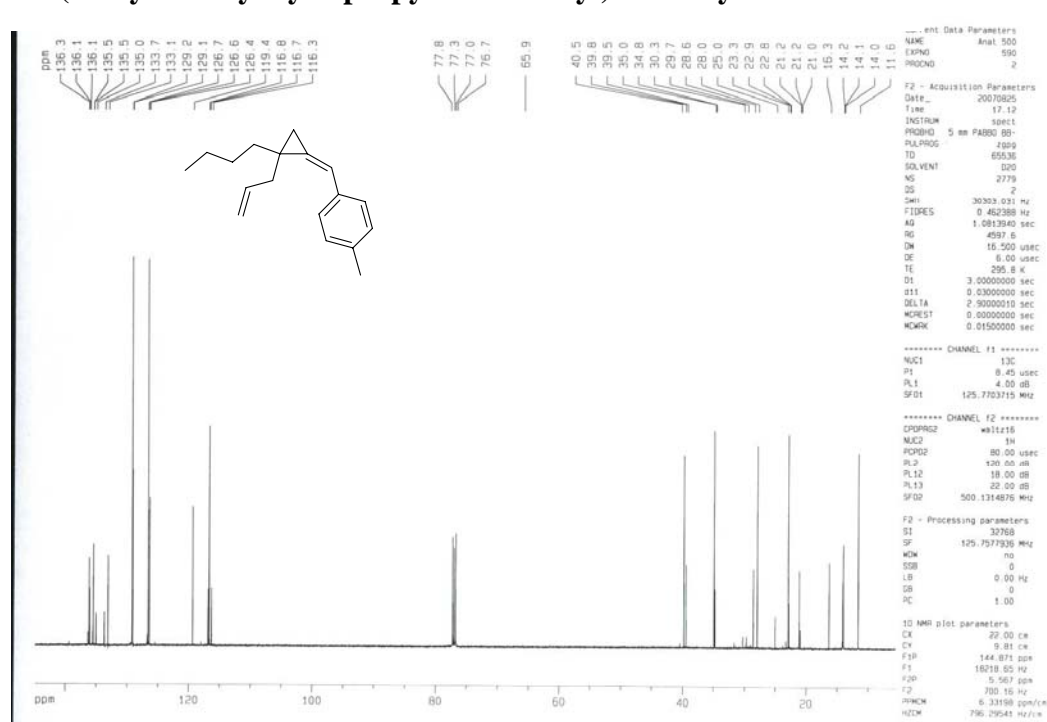

# 1,1,2-triallyl-2-butylcyclopropane 11

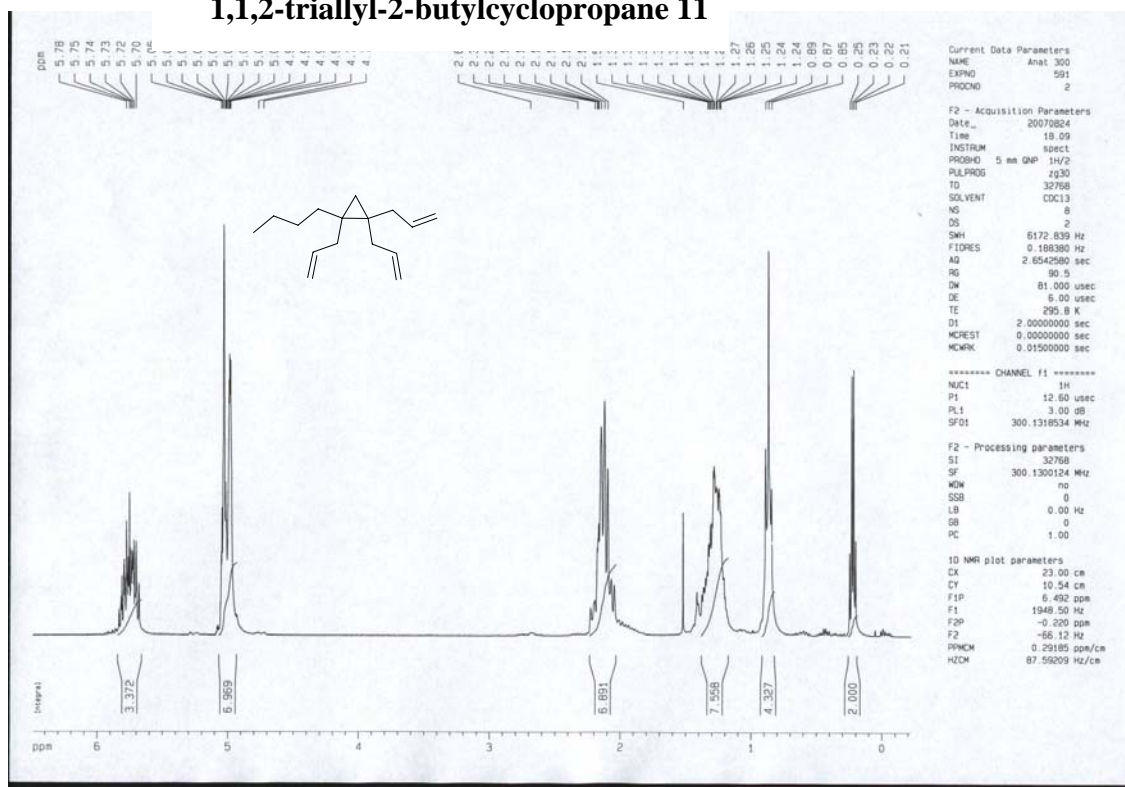

# 1,1,2-triallyl-2-butylcyclopropane 11

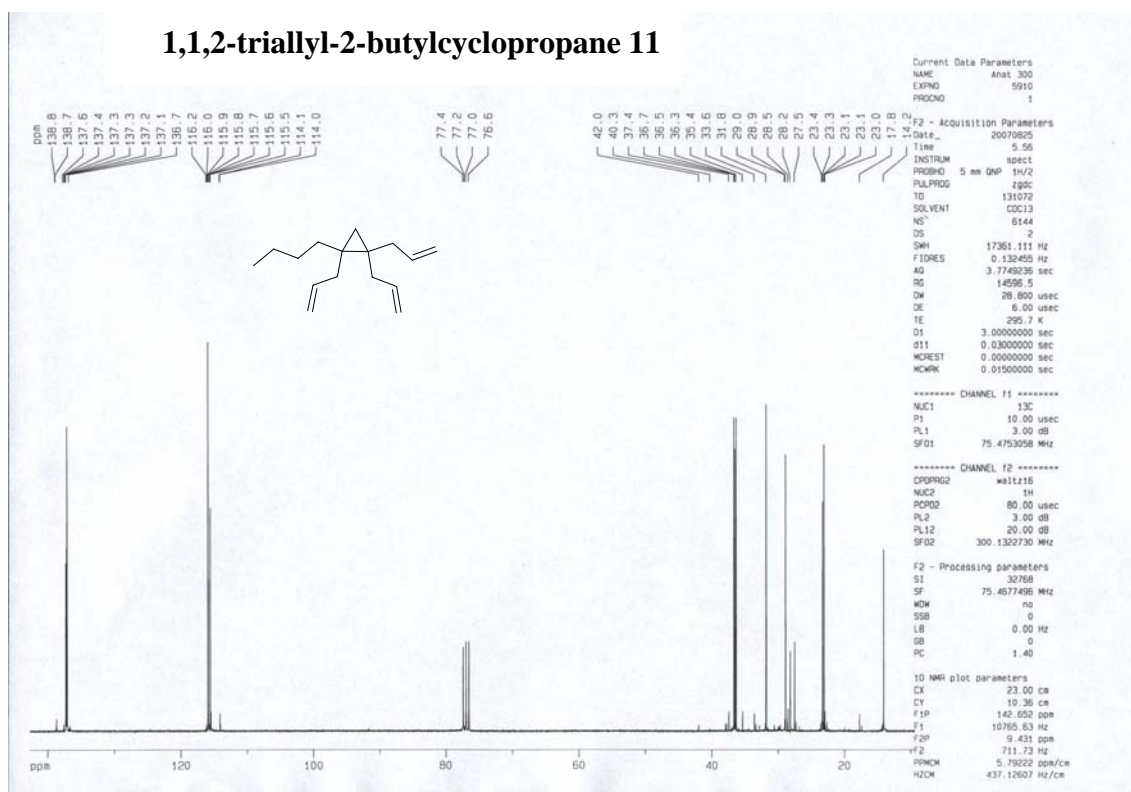

## 2-allyl-2-butyl-cyclopropanecarboxylic acid 15

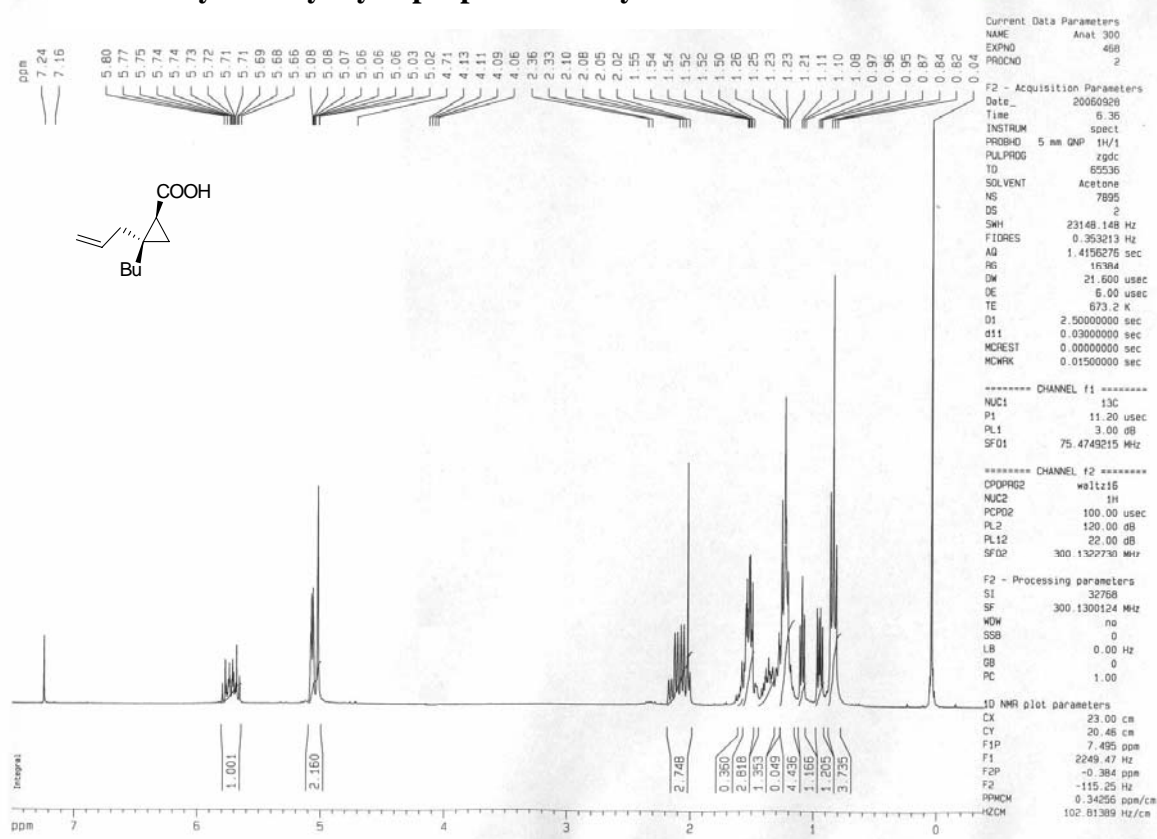

## 2-allyl-2-butyl-cyclopropanecarboxylic acid 15

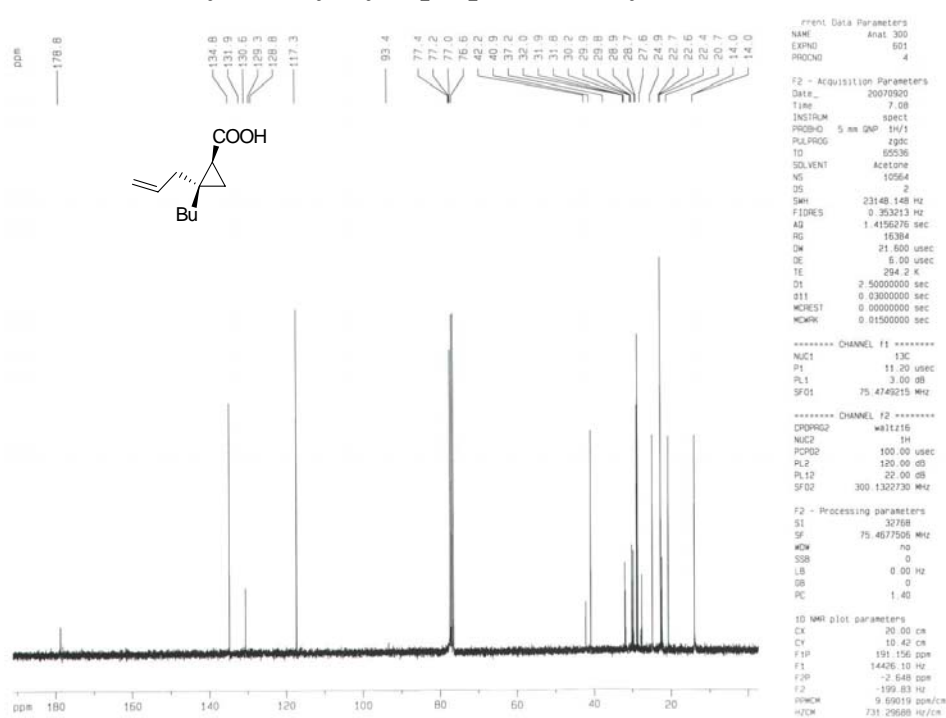

## (2-allyl-2-butyl-cyclopropyl)-methanol 16



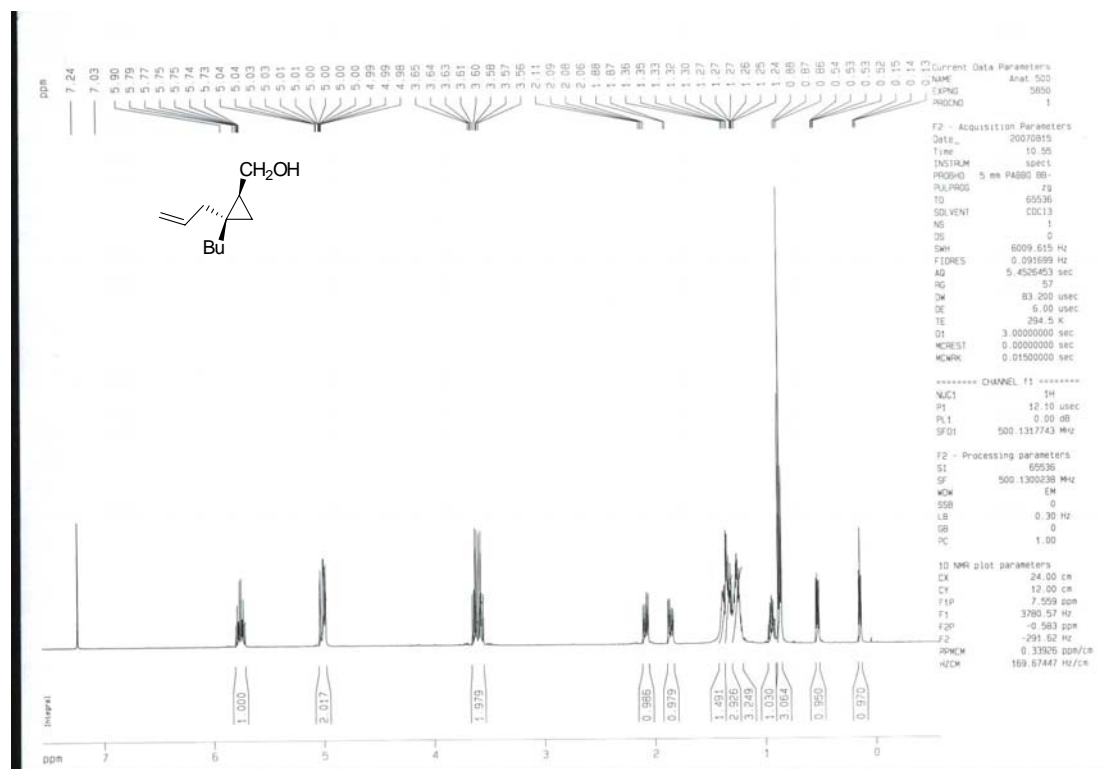

### (2-allyl-2-butyl-cyclopropyl)-methanol 16

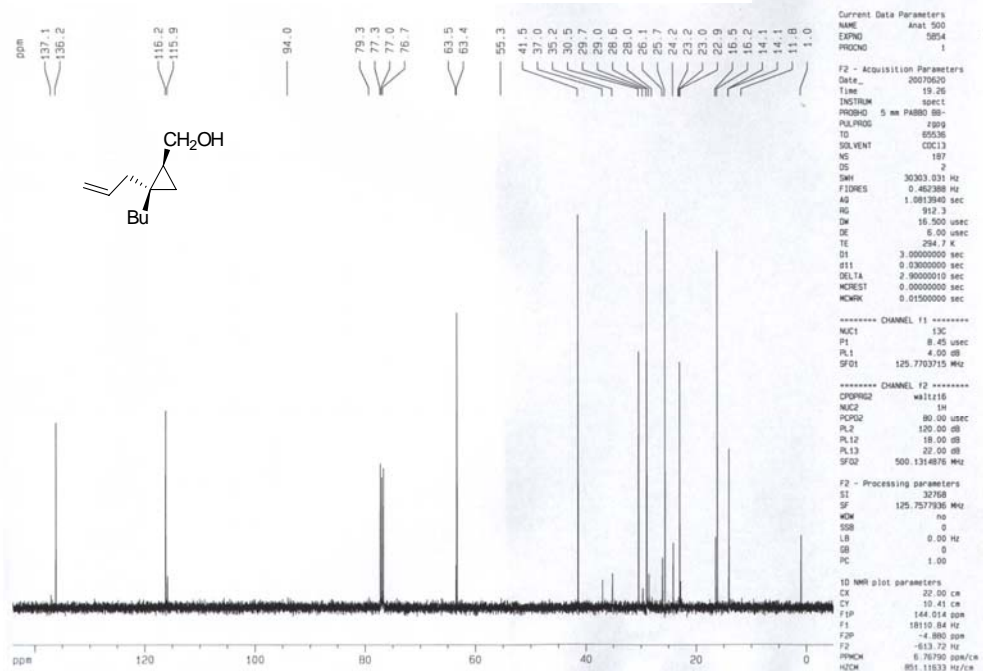

### ((1S,2R)-2-allyl-2-butyl-1-phenylcyclopropyl)methanol 17

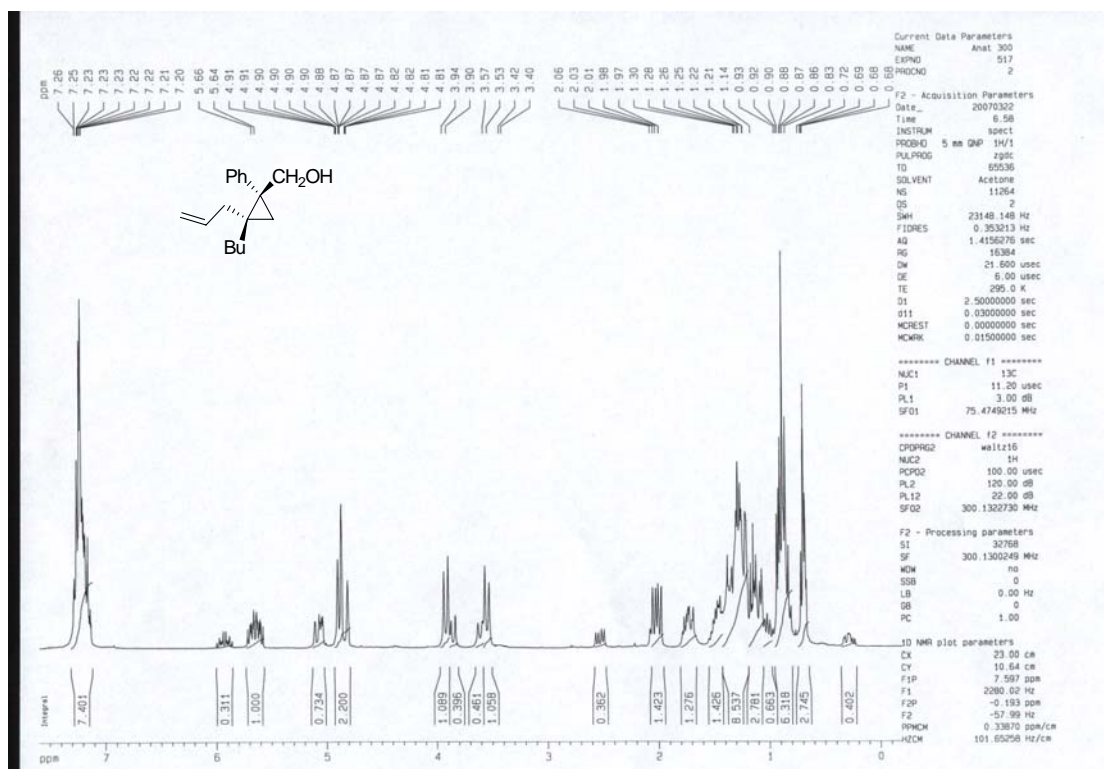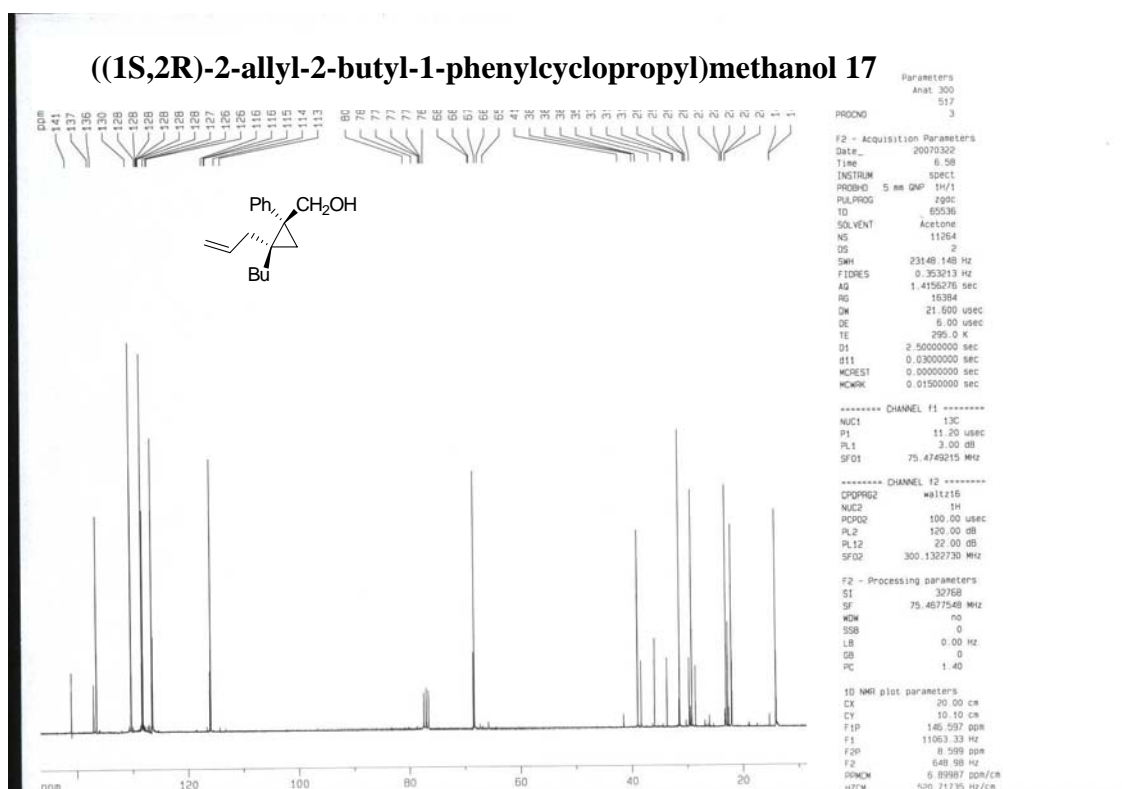

**(2-allyl-2-butyl-3,3-diiodo-cyclopropyl)-methanol 18**



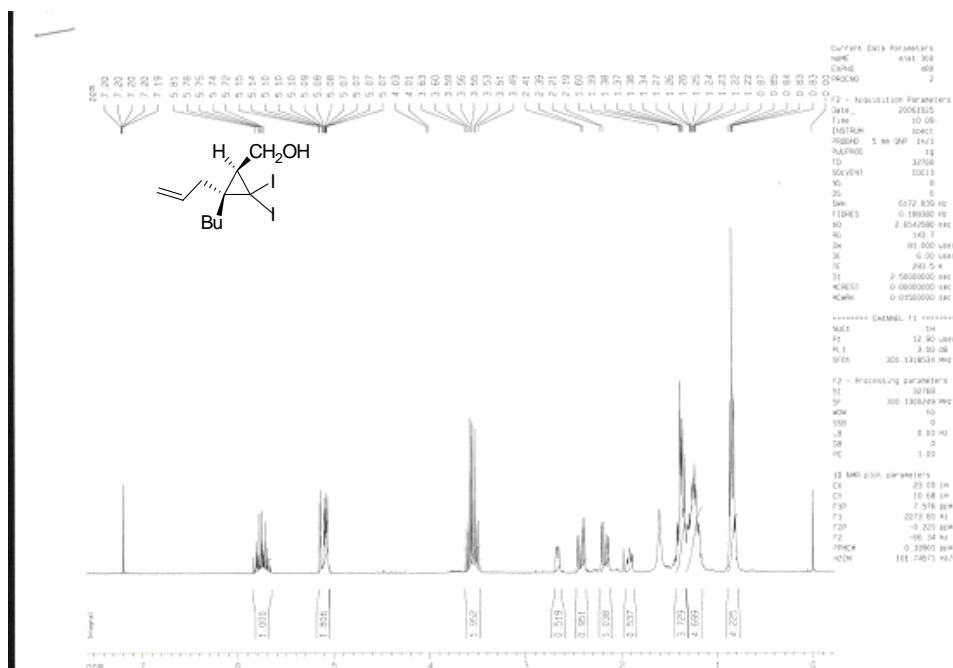

**(2-allyl-2-butyl-3-iodo-cyclopropyl)-methanol 20**

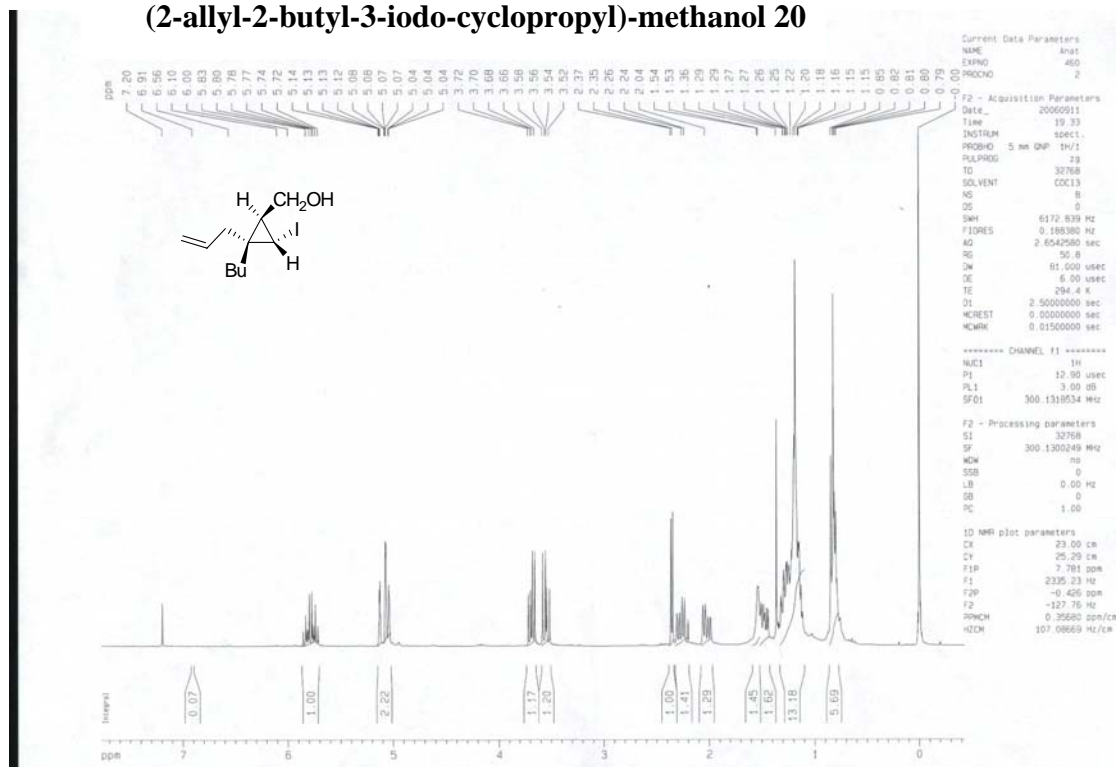

**(1R,2S)-1-allyl-1-butyl-2-((2-methoxypropan-2-yloxy)methyl)cyclopropane 21**

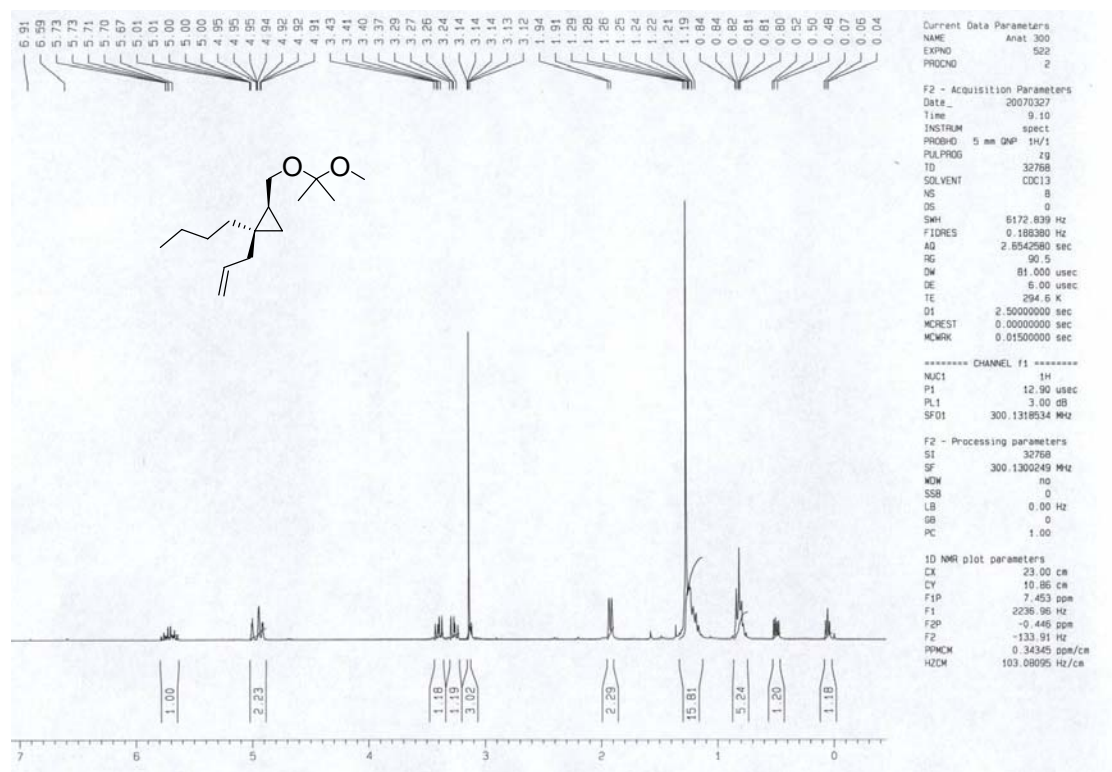

**(1R,2S)-1-allyl-1-butyl-2-((2-methoxypropan-2-yloxy)methyl)cyclopropane 21**

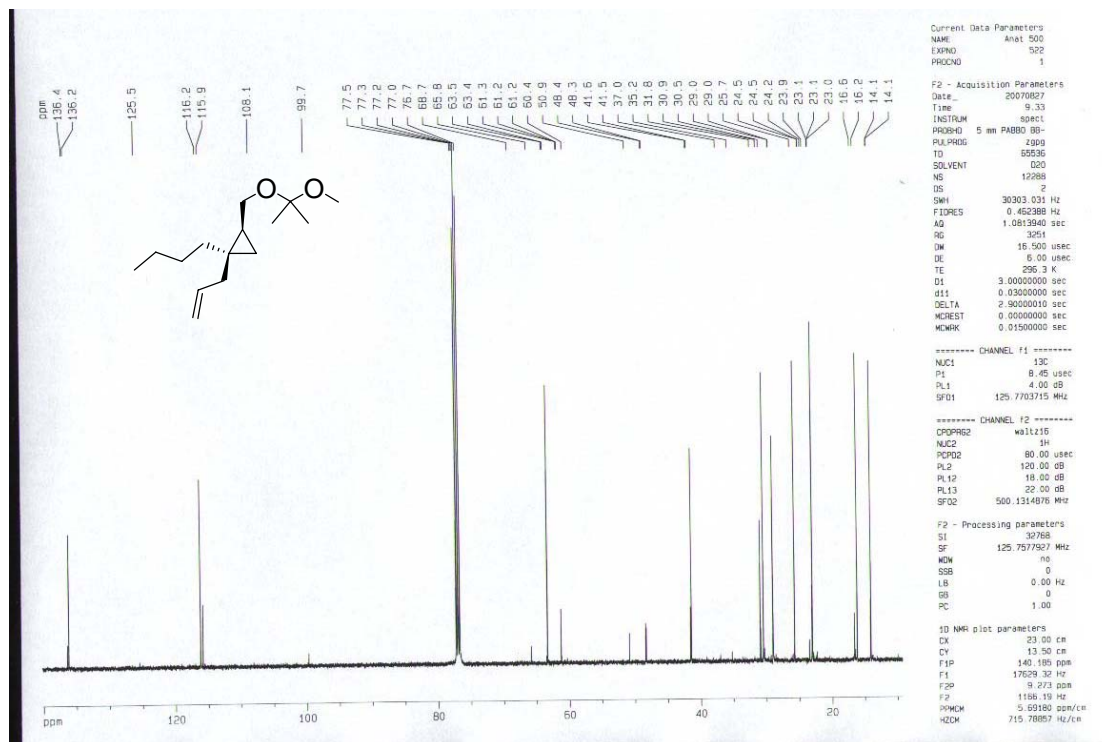

Supplement: b807635a.pdf [file b807635a.pdf]
